# Supplementary material for: Intense Pulsed Light Therapy in the Treatment of Dry Eye Diseases: A Systematic Review and Meta-Analysis
Source: MDPI journal article supplement (doi:10.3390/jcm12083039), 2023-04-21
Supplement: s1 [file s1]

**Supplementary Table S1.** Data collected.

| <b>Data Collected and Used in Analyses</b>                                                                       | <b>Data Collected and Used for Subgroups</b>                                                                                                         | <b>Data Collected and Not Analyzed</b>                                                                                                                                                     |
|------------------------------------------------------------------------------------------------------------------|------------------------------------------------------------------------------------------------------------------------------------------------------|--------------------------------------------------------------------------------------------------------------------------------------------------------------------------------------------|
| <ul style="list-style-type: none"> <li>- Sample size</li> <li>- NIBUT</li> <li>- TBUT</li> <li>- OSDI</li> </ul> | <ul style="list-style-type: none"> <li>- Device characteristics</li> <li>- Control group intervention</li> <li>- Age</li> <li>- Sex ratio</li> </ul> | <ul style="list-style-type: none"> <li>- Country of origin of the study</li> <li>- Year of publication</li> <li>- Treatment schedule and frequency</li> <li>- Longest follow-up</li> </ul> |
